# Supplementary material for: Mycobacterium tuberculosis complex drug-resistance, phylogenetics, and evolution in Nigeria: Comparison with Ghana and Cameroon
Source: PubMed Central journal article supplement (PMC10597489; doi:10.1371/journal.pntd.0011619), 2023-10-12

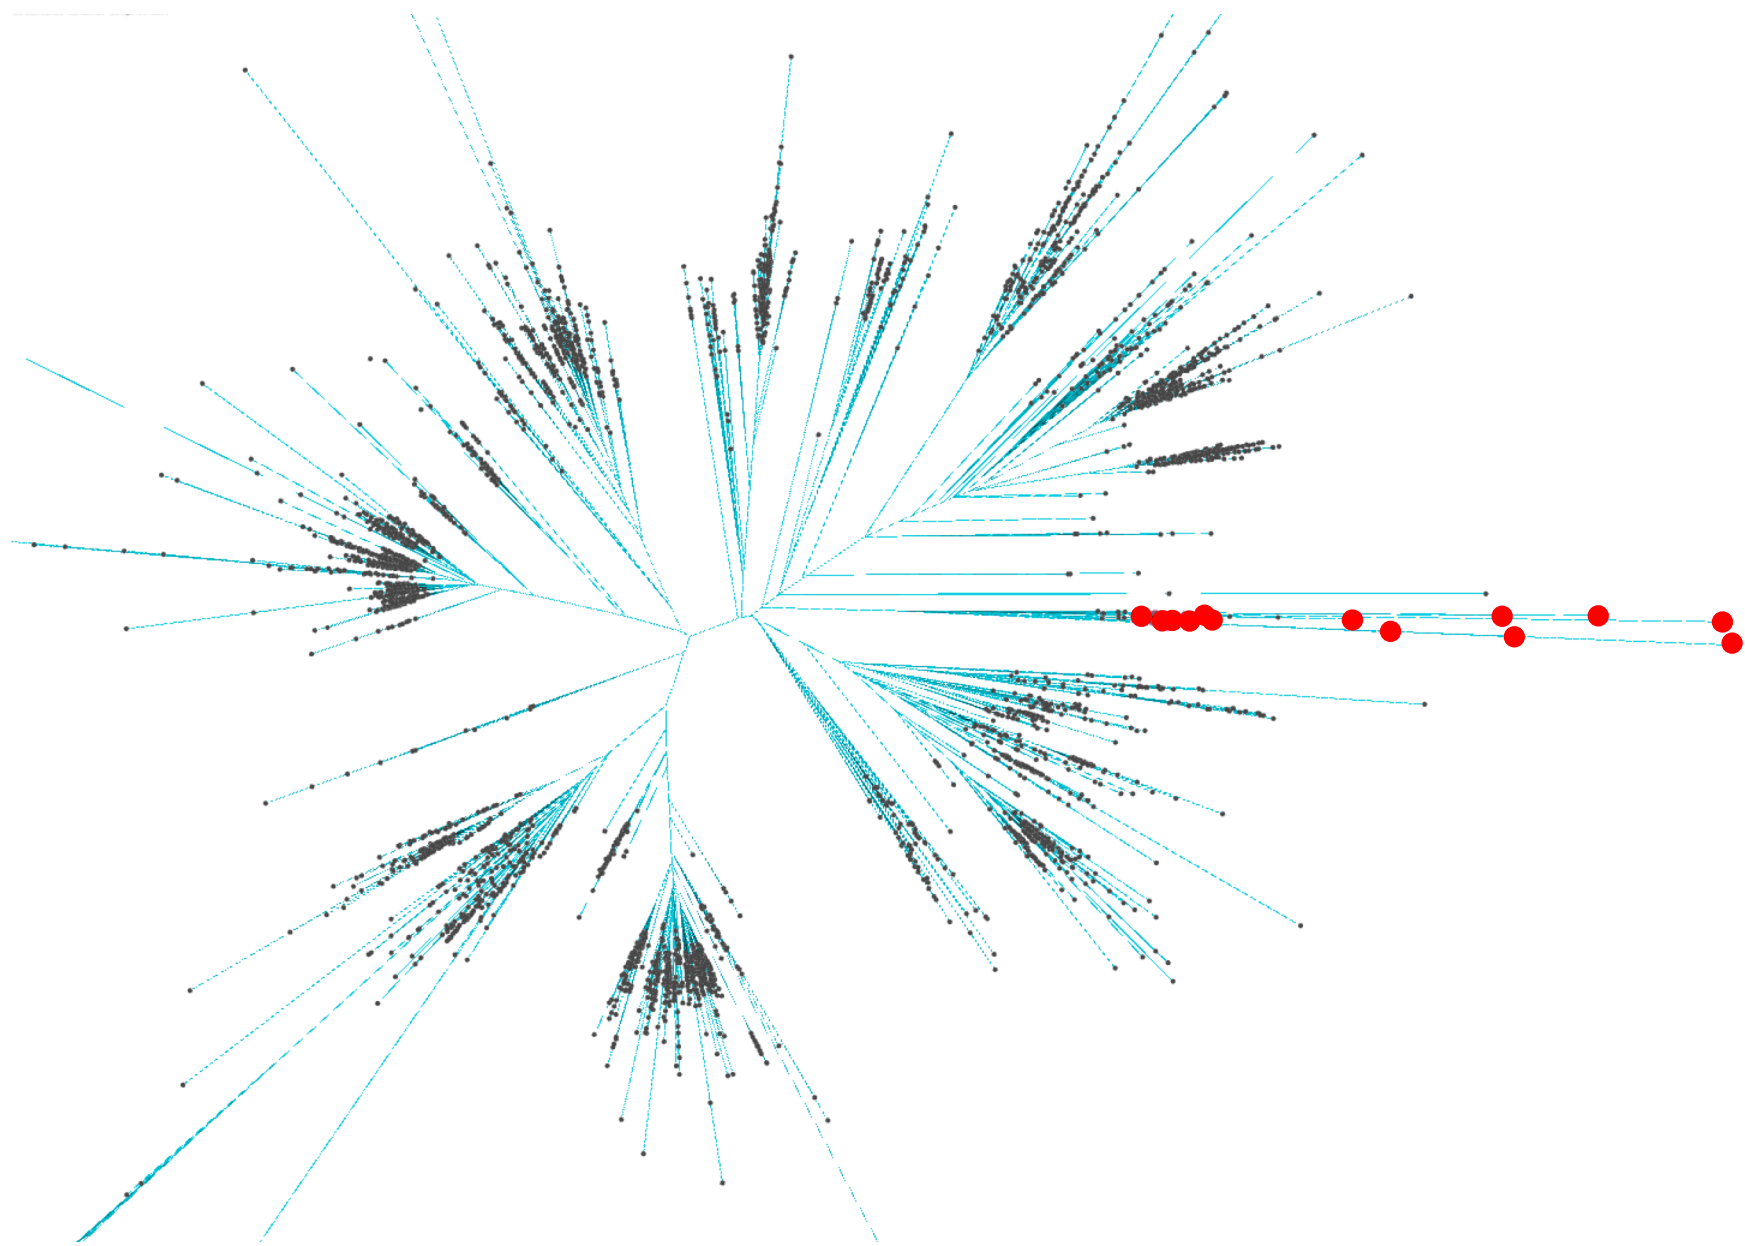

Supplement: pntd.0011619.s004.pdf [file pntd.0011619.s004.pdf]
